# Supplementary material for: Mosaic PPM1D mutations are associated with predisposition to breast and ovarian cancer
Source: Springer Nature journal article supplement (doi:10.1038/nature11725), 2012-12-14
Supplement: 41586_2013_BFnature11725_MOESM26_ESM.pdf [file 41586_2013_BFnature11725_MOESM26_ESM.pdf]

**Supplementary Figure 1.** Samples, sequencing methods and *PPM1D* PTVs identified in different phases of the experiment

| <b>Phase 1— case only DNA repair panel sequencing</b> |                                                              |               |
|-------------------------------------------------------|--------------------------------------------------------------|---------------|
| <b>Method</b>                                         | NGS of custom pulldown including 507 DNA repair genes        |               |
| <b>Samples</b>                                        | 1150 cases (in 48 pools of 24 samples)                       |               |
| <b>PPM1D PTVs</b>                                     | 5 cases                                                      |               |
| <b>Phase 2— case-control <i>PPM1D</i> sequencing</b>  |                                                              |               |
| <b>a)</b>                                             |                                                              |               |
| <b>Method</b>                                         | <i>PPM1D</i> full gene Sanger sequencing                     |               |
| <b>Samples</b>                                        | 2456 cases                                                   | 1347 controls |
| <b>PPM1D PTVs</b>                                     | 10 cases                                                     | 0 control     |
| <b>b)</b>                                             |                                                              |               |
| <b>Method</b>                                         | <i>PPM1D</i> mutation cluster region (MCR) Sanger sequencing |               |
| <b>Samples</b>                                        | 5325 cases                                                   | 4514 controls |
| <b>PPM1D PTVs</b>                                     | 15 cases                                                     | 1 control     |

**Supplementary Figure 2: Coverage of custom pulldown by pool**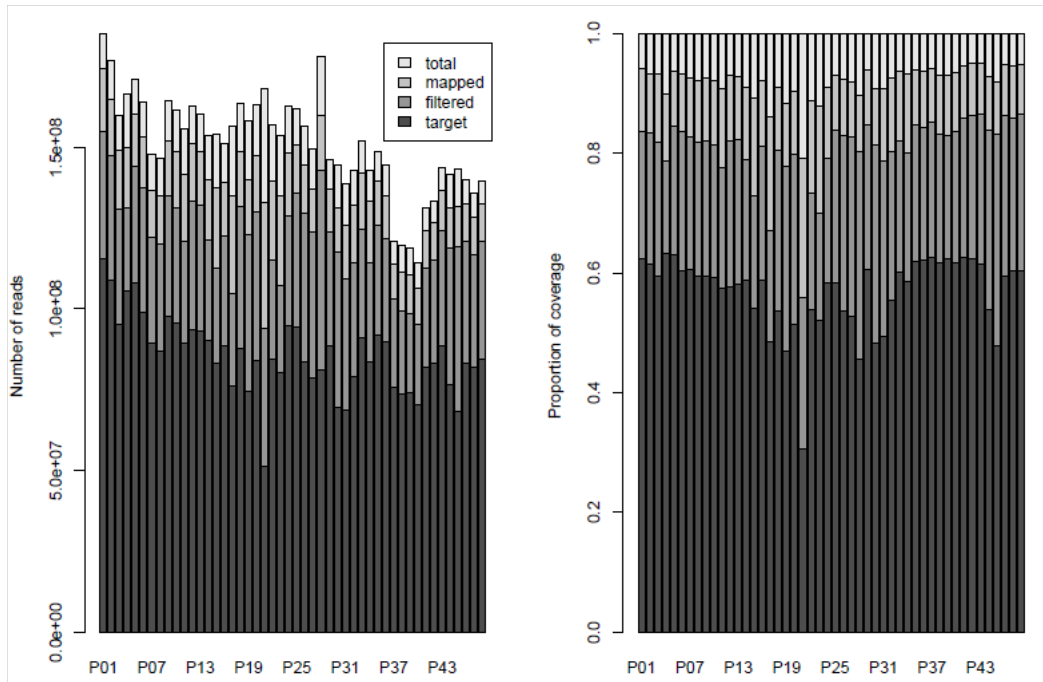

Bars indicate the absolute (left) and relative (right) number of reads obtained from sequencing the total number of reads (total), mapped to the reference (mapped), remaining after application of quality filters (filtered) and high quality reads mapped to the target regions (target). Mapped reads were filtered to remove ambiguous alignments with a quality score of 0 and bases with a call quality below 22 were masked. Of the remaining reads of each pool 50-60% fell within the target regions, except for Pool 21, where the on target percentage was significantly lower.

**Supplementary Figure 3.** Sanger sequencing chromatograms for 26 *PPM1D* mutations

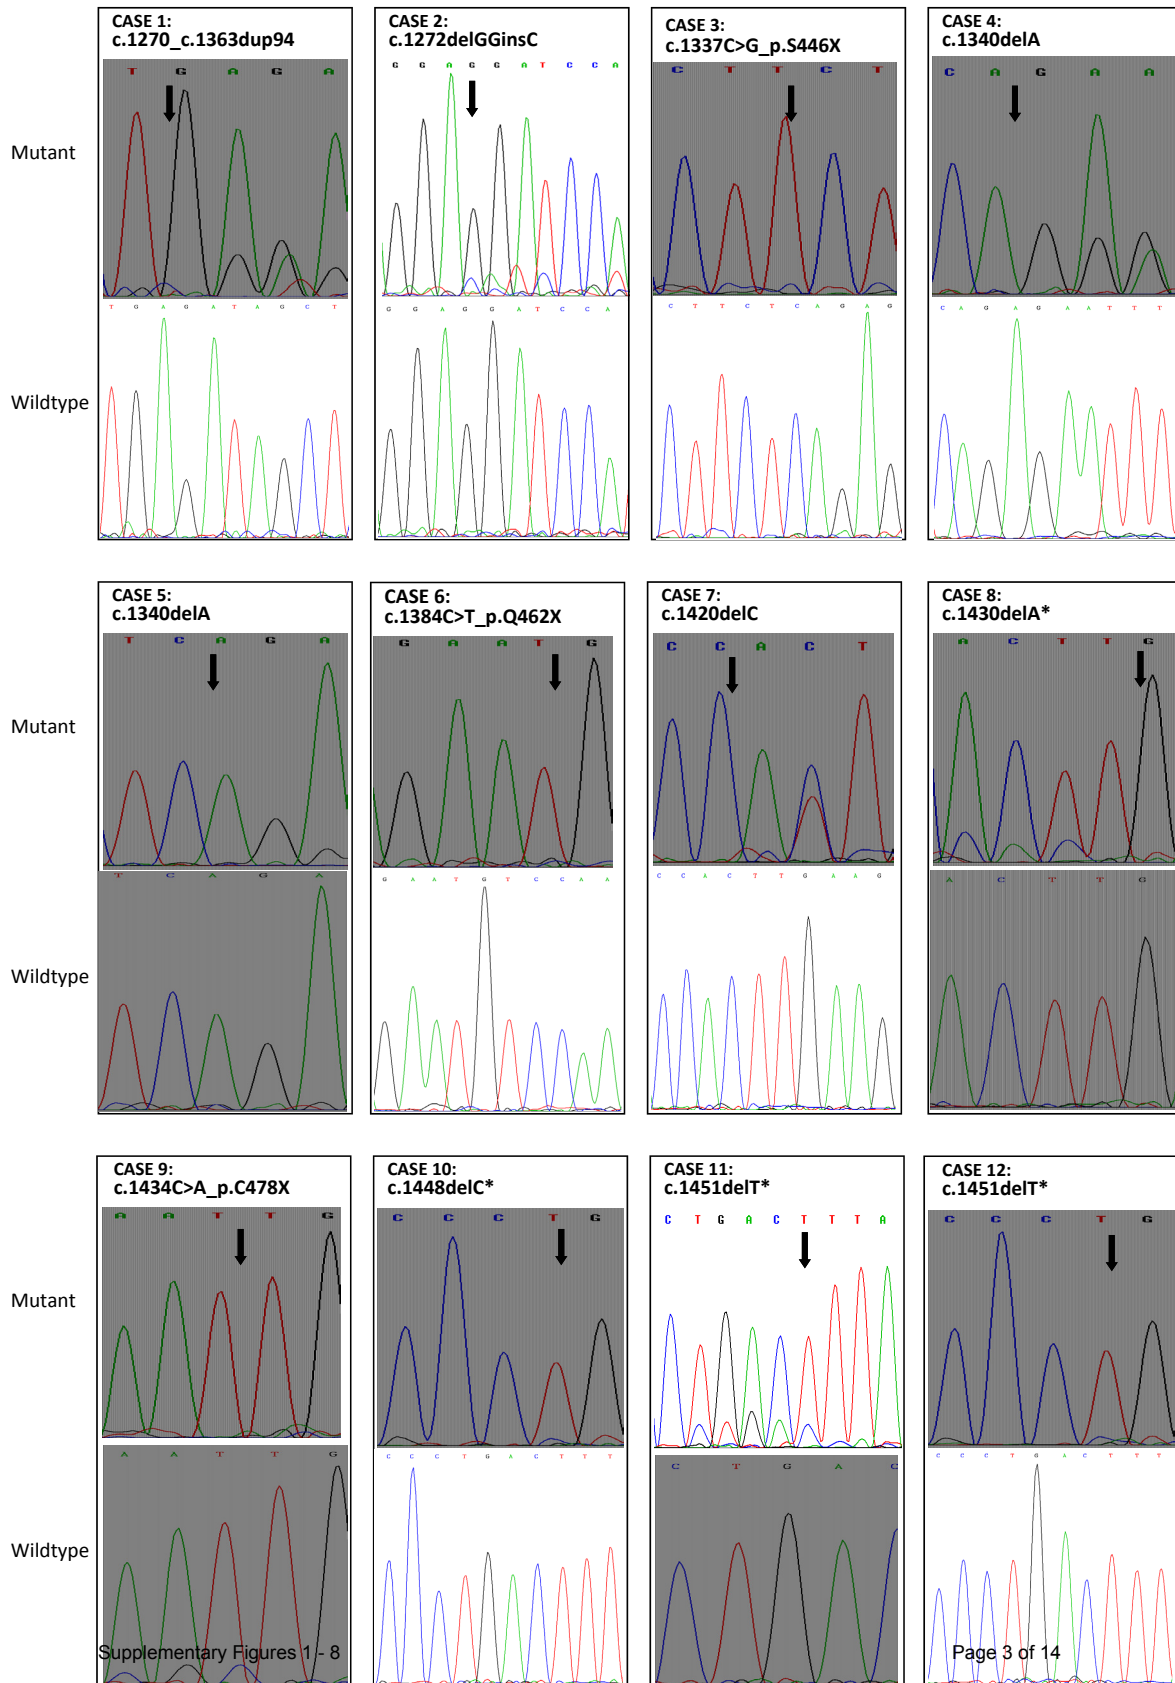

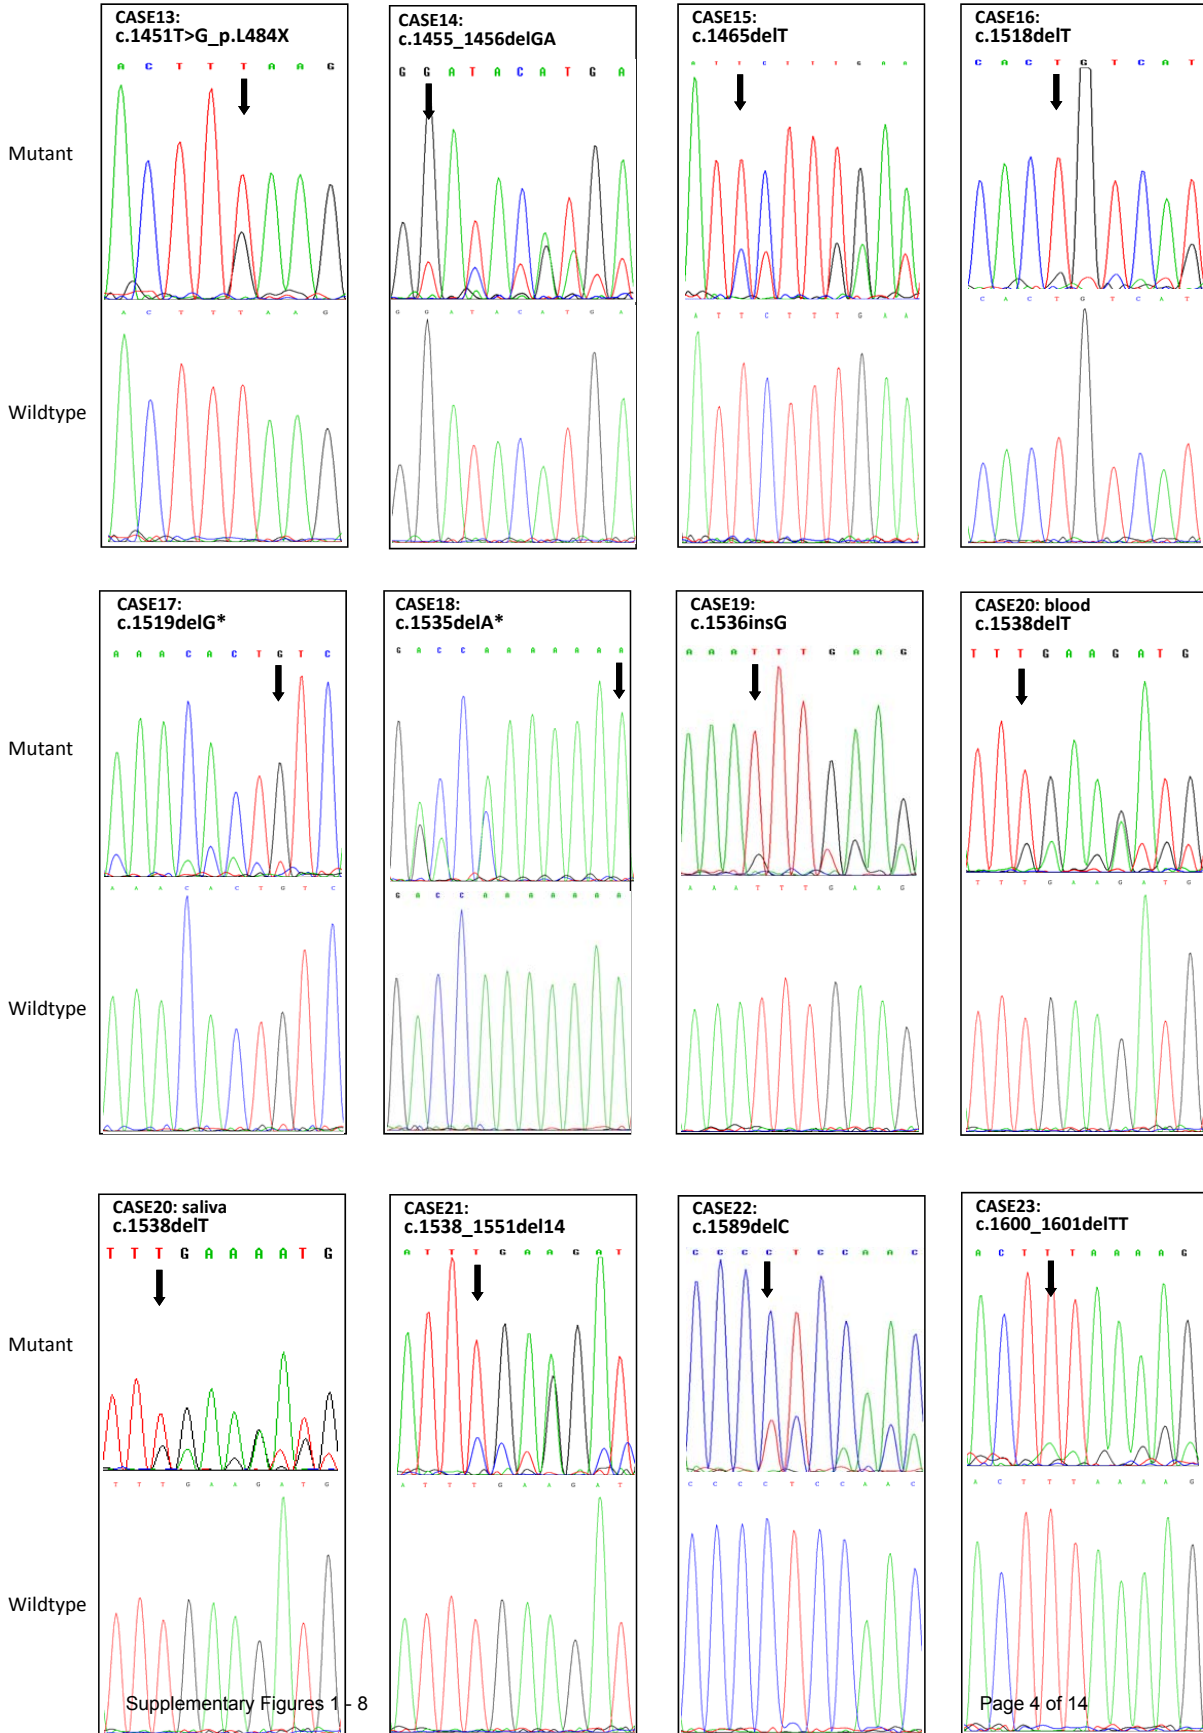

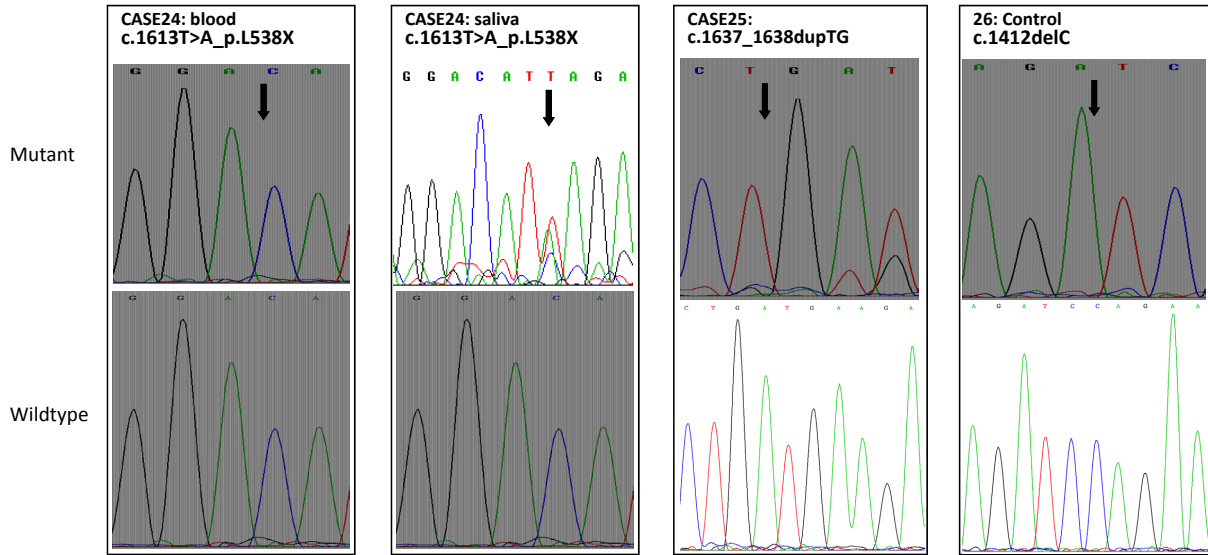

The mutant allele is lower than typical of heterozygous mutations, consistent with mosaicism.  
 \*indicates that the reverse sequencing trace is presented.

**Supplementary Figure 4.** Deep PCR amplicon sequencing of *BRCA1*, *BRCA2* and *PPM1D* cluster region showing mosaic mutations.

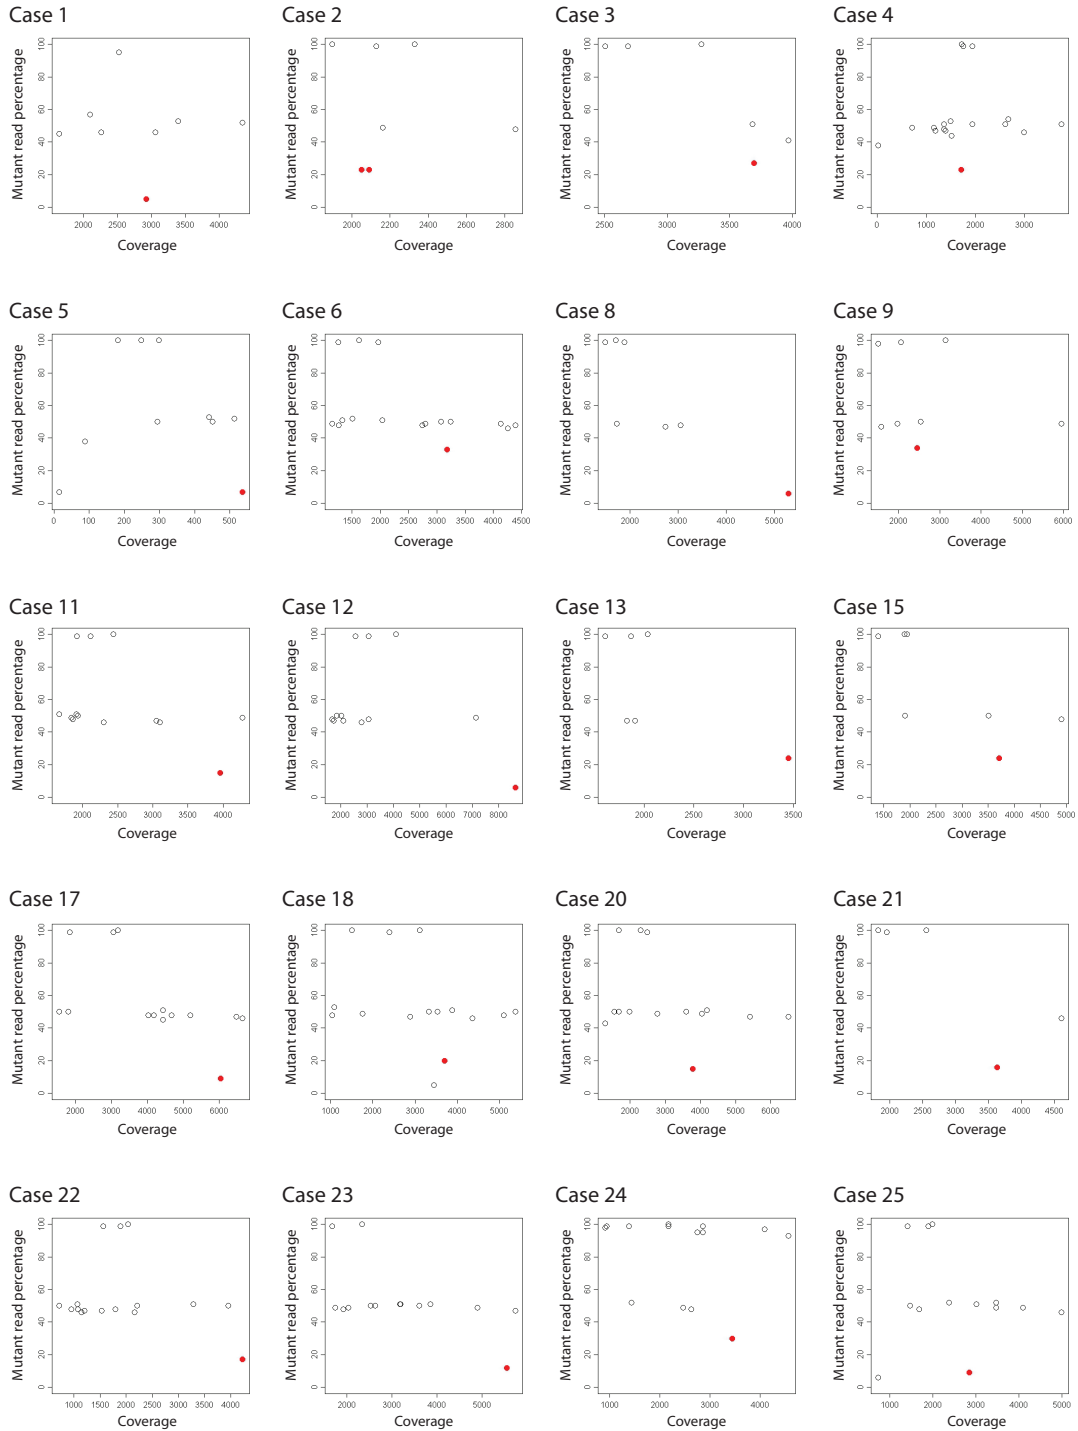

Mutant read percentage is calculated as the proportion of reads containing the variant. The red dot indicates the *PPM1D* mutation. In case 2, the complex indel was called as two different mutations and thus two red dots. Variants were censored at 5%. All mutations have a consistently lower mutant read percentage, indicating mosaicism. Open dots represent variants in *BRCA1* or *BRCA2*.

**Supplementary Figure 5.** MLPA profiles showing *PPM1D* mutations.

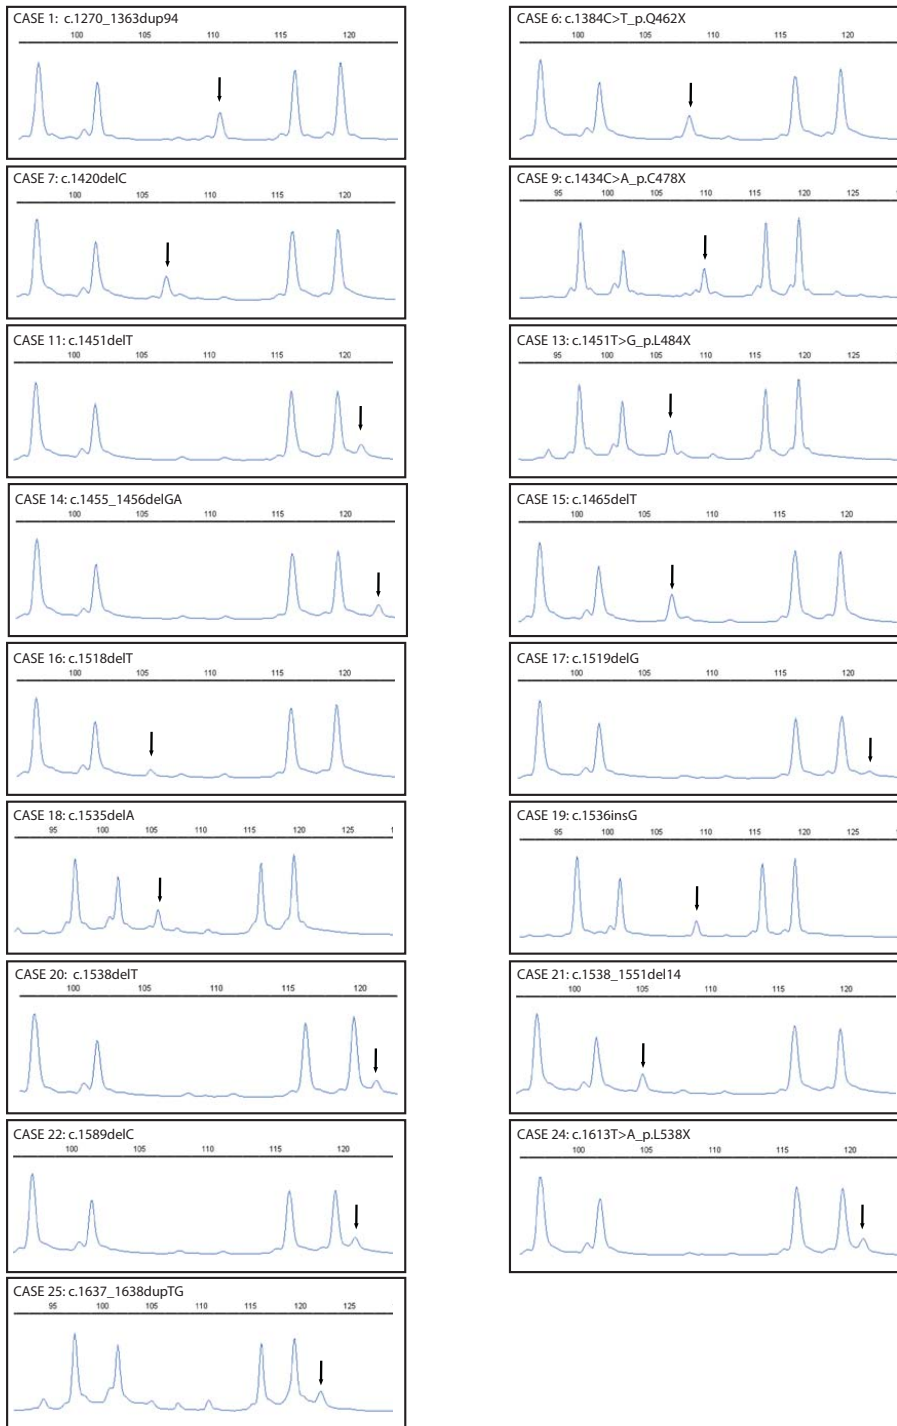

**Supplementary Figure 6.** DNA repair panel individual sequencing in six *PPM1D* mutation carriers.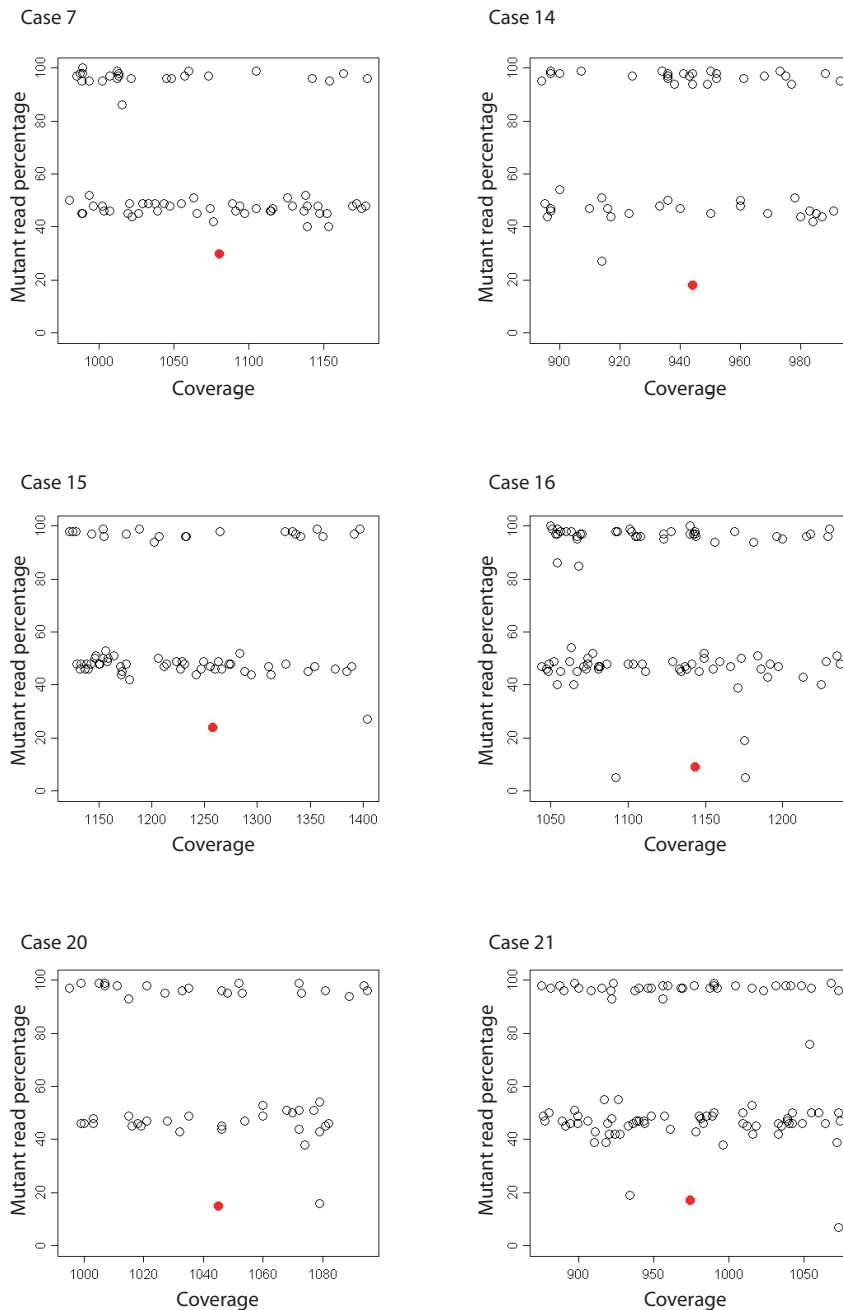

Mutant read percentage was calculated as in Supplementary Figure 4. Read coverage was recorded at all variant sites, counting only bases within reads with a mapping quality of at least 20 and a base quality of at least 22. A window around the mutation containing at least 50 variants with similar coverage was identified. The red dot indicates the *PPM1D* mutation. Open dots represent other variants in the custom pulldown which were not validated. All *PPM1D* mutations were consistently lower, indicating mosaicism. Mutant read percentages for cases 15, 20 and 21 matched those in Supplementary Figure 4.



**Supplementary Figure 7: The effect of mutant PPM1D isoforms on p53 activation**

### 293T

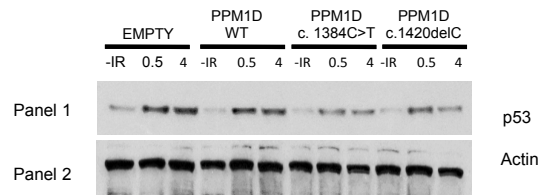

### Hela

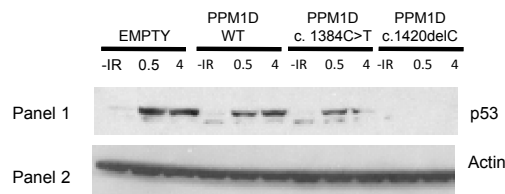

p53 wild type HeLa and HEK293 cells were transfected with *PPM1D* cDNA expression constructs and exposed to ionising irradiation (5 Grays). At 30 minute and four hour intervals after IR exposure whole cell lysates were generated and western blotted to estimate the IR induced activation of p53. Western blots showing p53 and actin (loading control) protein levels at different times (in hours) after IR exposure are shown. 'Empty' represents cells transfected with an empty expression construct, 'PPM1D WT' represents cells transfected with a wild type *PPM1D* cDNA expression construct and 'PPM1D c.1384C>T' and 'PPM1D c.1420delC' represent cells transfected with mutant *PPM1D* cDNA constructs. The suppression of p53 was enhanced in cells transfected with the mutant constructs suggesting these alleles encode hyperactive PPM1D isoforms.

**Supplementary Figure 8. Tumour haplotype analysis, Sanger sequencing and MLPA analysis**

**Case 11 c.1451delT**

**Microsatellite intensities**

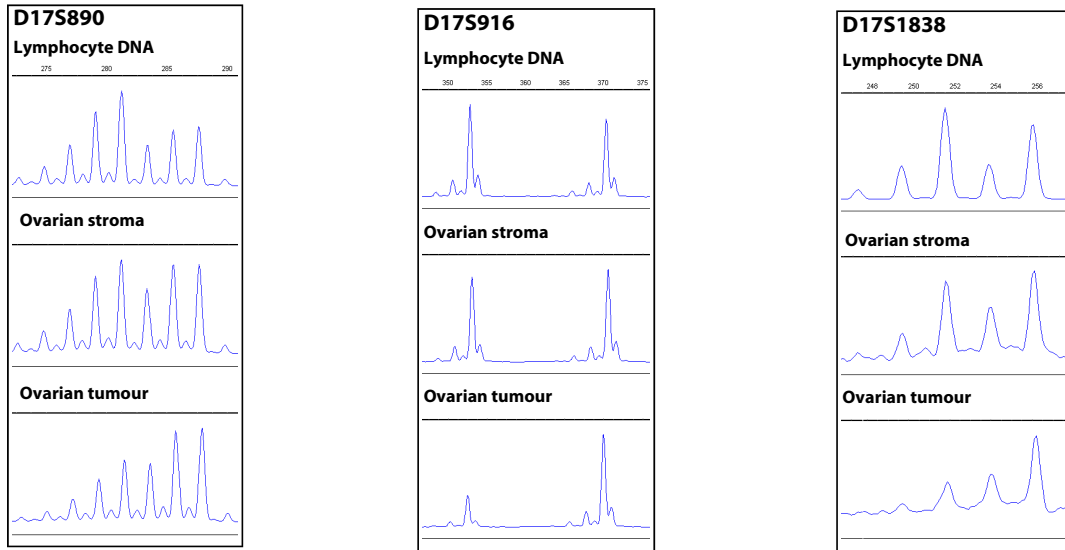

**Sanger sequencing chromatograms**

**Lymphocyte DNA**

C C T G A C T T T A A

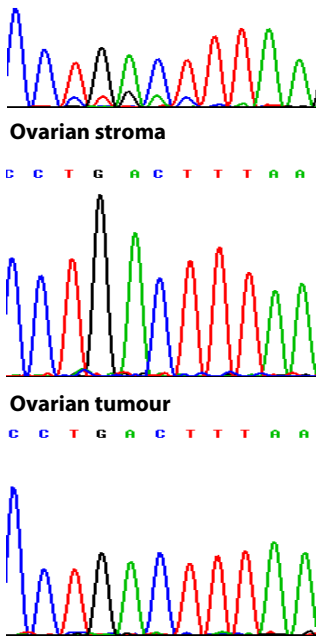

**MLPA dosage plots**

**Lymphocyte DNA**

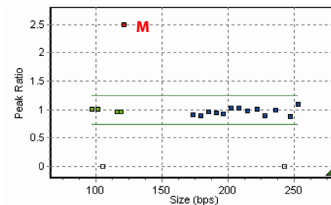

**Ovarian tumour**

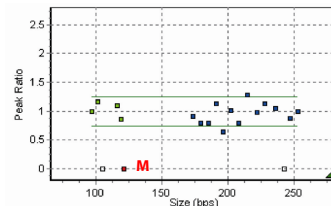

**MLPA intensities**

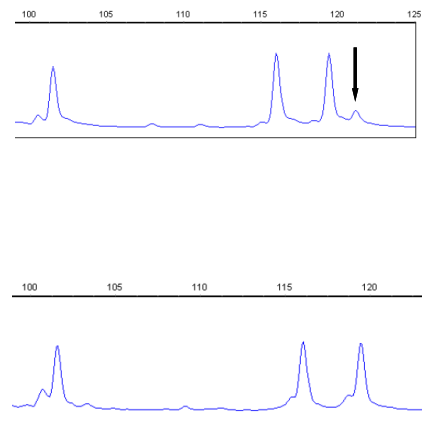

**Case 15: c.1465delT**

**Microsatellite intensities**

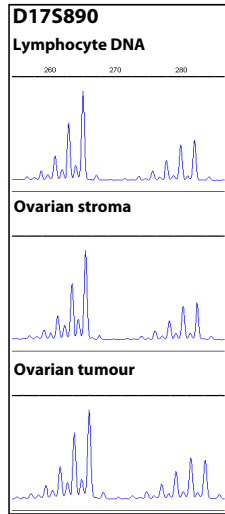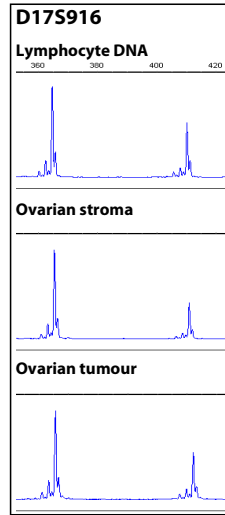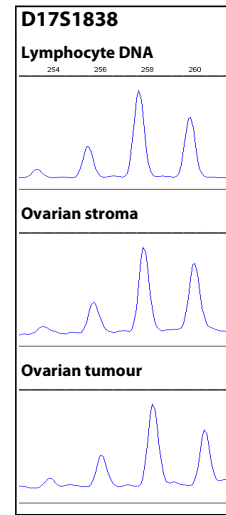

**Sanger sequencing chromatograms**

**Lymphocyte DNA**

A T T C T T T G A A T

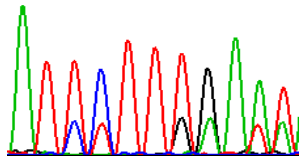

**Ovarian stroma**

A T T C T T T G A A T

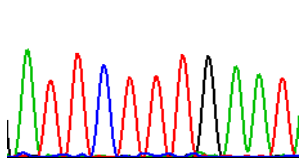

**Ovarian tumour**

A T T C T T T G A A T

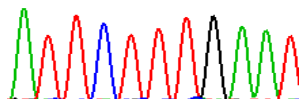

**MLPA dosage plots**

**Lymphocyte DNA**

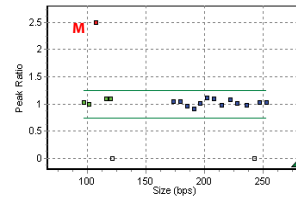

**Ovarian tumour**

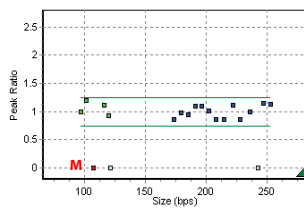

**MLPA intensities**

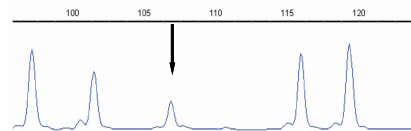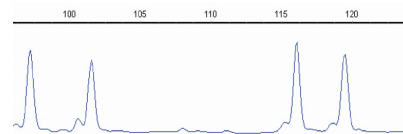

**Case 17: c.1519delG**

**Microsatellite intensities**

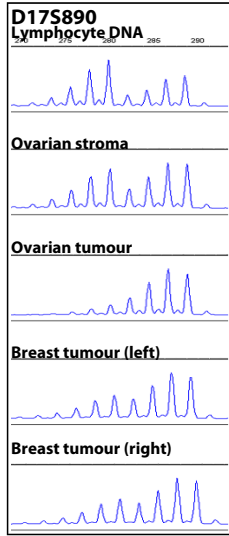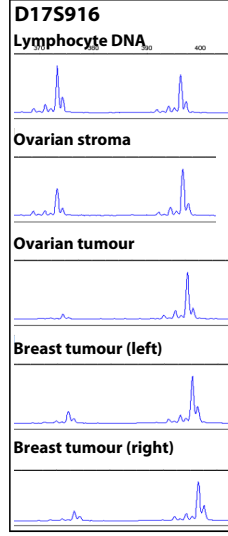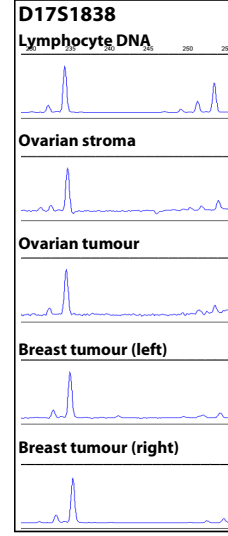

**Sanger sequencing chromatograms**

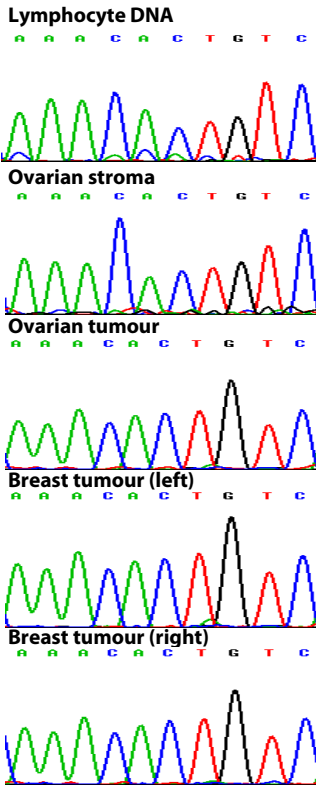

**MLPA dosage plots**

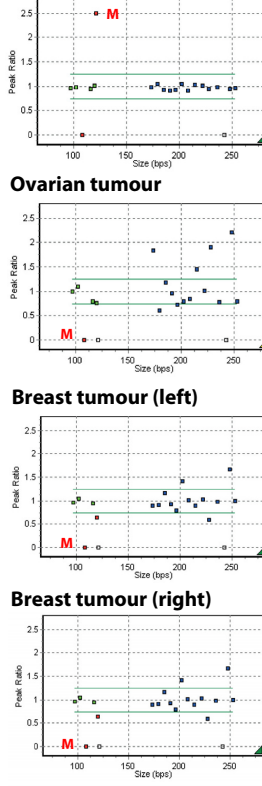

**MLPA intensities**

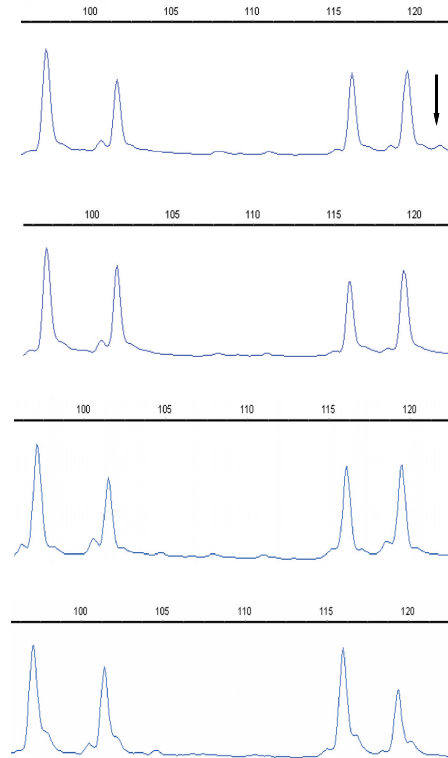

Case 20: c.1538delT

Microsatellite intensities

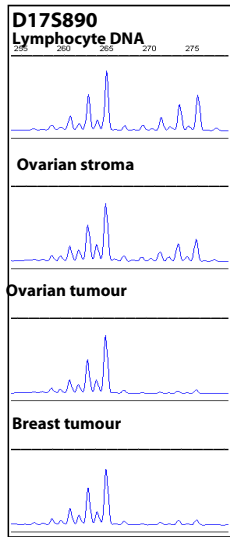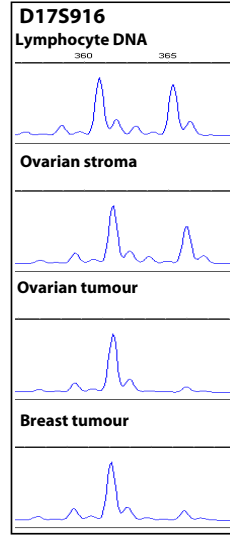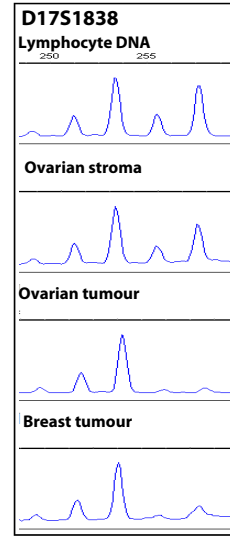

Sanger sequencing chromatograms

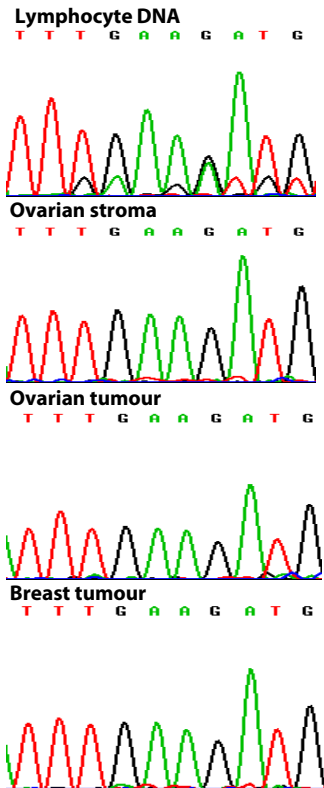

MLPA dosage plots

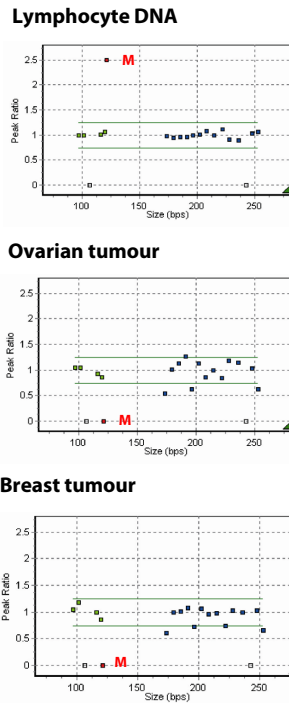

MLPA intensities

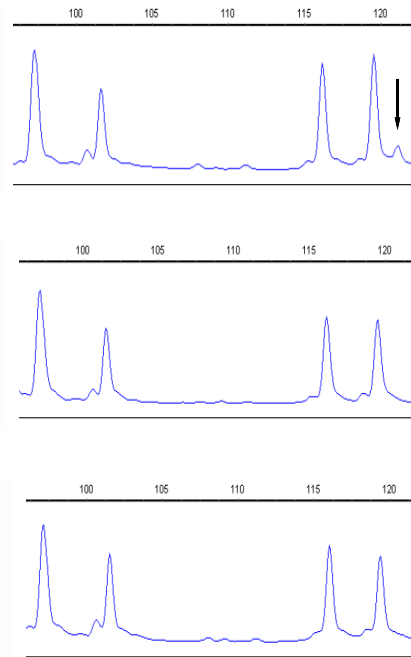

**Case 1 c.1270\_1363dup94**

**Microsatellite intensities**

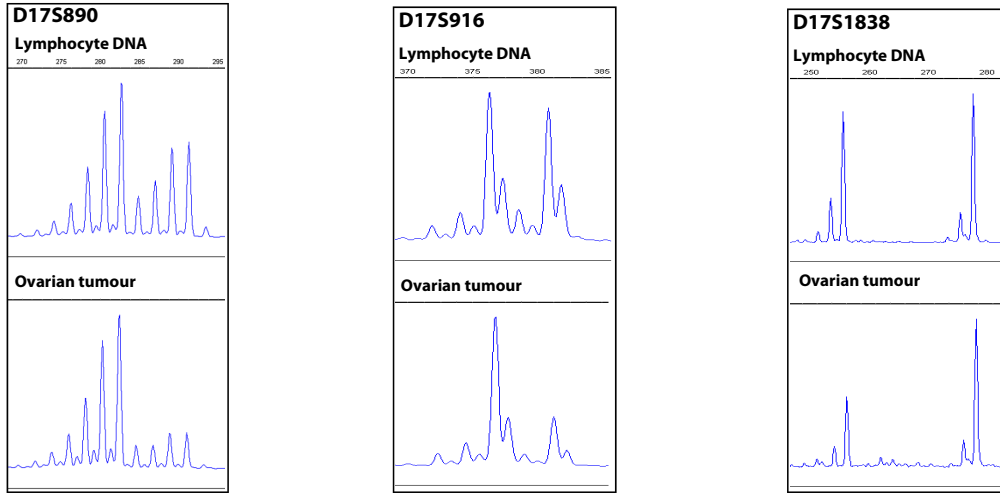

**Sanger sequencing chromatograms**

**Lymphocyte DNA**

T G A G A T A G C T

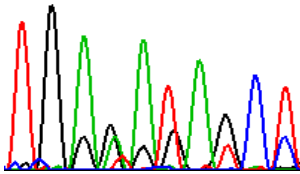

**Ovarian tumour**

T G A G A T A G C T

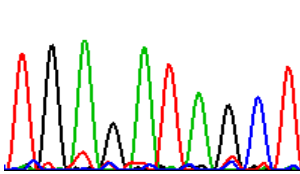

**MLPA dosage plots**

**Lymphocyte DNA**

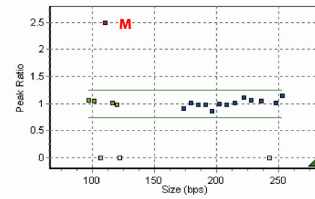

**Ovarian tumour**

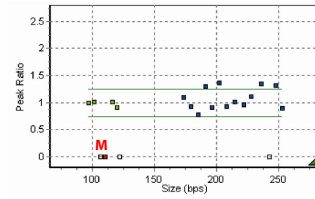

**MLPA intensities**

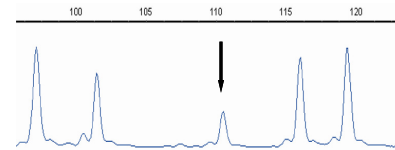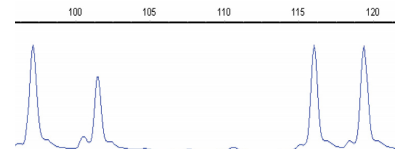

Microsatellite data demonstrates two alleles in DNA from lymphocytes and stroma and loss of heterozygosity in tumours in cases 1, 11, 17 and 20. There is no loss of heterozygosity in the tumour DNA from case 15. The Sanger sequencing and MLPA data demonstrate that the mosaic mutations in lymphocyte DNA are not detectable in stromal or tumour DNA. The data from deep PCR amplicon sequencing of tumour and stromal DNA is presented in Supplementary Table 5.

## The Wellcome Trust Case Control Consortium

The following individuals are part of the Wellcome Trust Case Control Consortium+

Jan Aerts<sup>1</sup>, Tariq Ahmad<sup>2</sup>, Hazel Arbury<sup>1</sup>, Anthony Attwood<sup>1,3,4</sup>, Adam Auton<sup>5</sup>, Stephen G Ball<sup>6</sup>, Anthony J Balmforth<sup>6</sup>, Chris Barnes<sup>1</sup>, Jeffrey C Barrett<sup>1</sup>, Inês Barroso<sup>1</sup>, Anne Barton<sup>7</sup>, Amanda J Bennett<sup>8</sup>, Sanjeev Bhaskar<sup>1</sup>, Katarzyna Blaszczyk<sup>9</sup>, John Bowes<sup>7</sup>, Oliver J Brand<sup>8,10</sup>, Peter S Braund<sup>11</sup>, Francesca Bredin<sup>12</sup>, Gerome Breen<sup>13,14</sup>, Morris J Brown<sup>15</sup>, Ian N Bruce<sup>7</sup>, Jaswinder Bull<sup>16</sup>, Oliver S Burren<sup>17</sup>, John Burton<sup>1</sup>, Jake Byrnes<sup>18</sup>, Sian Caesar<sup>19</sup>, Niall Cardin<sup>5</sup>, Chris M Clee<sup>1</sup>, Alison J Coffey<sup>1</sup>, John MC Connell<sup>20</sup>, Donald F Conrad<sup>1</sup>, Jason D Cooper<sup>17</sup>, Anna F Dominiczak<sup>20</sup>, Kate Downes<sup>17</sup>, Hazel E Drummond<sup>21</sup>, Darshna Dudakia<sup>16</sup>, Andrew Dunham<sup>1</sup>, Bernadette Ebbs<sup>16</sup>, Diana Eccles<sup>22</sup>, Sarah Edkins<sup>1</sup>, Cathryn Edwards<sup>23</sup>, Anna Elliot<sup>16</sup>, Paul Emery<sup>24</sup>, David M Evans<sup>25</sup>, Gareth Evans<sup>26</sup>, Steve Eyre<sup>7</sup>, Anne Farmer<sup>14</sup>, I Nicol Ferrier<sup>27</sup>, Edward Flynn<sup>7</sup>, Alistair Forbes<sup>28</sup>, Liz Forty<sup>29</sup>, Jayne A Franklyn<sup>10,30</sup>, Timothy M Frayling<sup>2</sup>, Rachel M Freathy<sup>2</sup>, Eleni Giannoulatou<sup>5</sup>, Paul Gilbert<sup>7</sup>, Katherine Gordon-Smith<sup>19,29</sup>, Emma Gray<sup>1</sup>, Elaine Green<sup>29</sup>, Chris J Groves<sup>8</sup>, Detelina Grozeva<sup>29</sup>, Rhian Gwilliam<sup>1</sup>, Naomi Hammond<sup>1</sup>, Matt Hardy<sup>17</sup>, Pile Harrison<sup>31</sup>, Neelam Hassanali<sup>8</sup>, Husam Hebaishi<sup>1</sup>, Sarah Hines<sup>16</sup>, Anne Hinks<sup>7</sup>, Graham A Hitman<sup>32</sup>, Lynne Hocking<sup>33</sup>, Chris Holmes<sup>5</sup>, Eleanor Howard<sup>1</sup>, Philip Howard<sup>34</sup>, Joanna MM Howson<sup>17</sup>, Debbie Hughes<sup>16</sup>, Sarah Hunt<sup>1</sup>, John D Isaacs<sup>35</sup>, Mahim Jain<sup>18</sup>, Derek P Jewell<sup>36</sup>, Toby Johnson<sup>34</sup>, Jennifer D Jolley<sup>3,4</sup>, Ian R Jones<sup>29</sup>, Lisa A Jones<sup>19</sup>, George Kirov<sup>29</sup>, Cordelia F Langford<sup>1</sup>, Hana Lango-Allen<sup>2</sup>, G Mark Lathrop<sup>37</sup>, James Lee<sup>12</sup>, Kate L Lee<sup>34</sup>, Charlie Lees<sup>21</sup>, Kevin Lewis<sup>1</sup>, Cecilia M Lindgren<sup>8,18</sup>, Meeta Maisuria-Armer<sup>17</sup>, Julian Maller<sup>18</sup>, John Mansfield<sup>38</sup>, Jonathan L Marchini<sup>5</sup>, Paul Martin<sup>7</sup>, Dunecan CO Massey<sup>12</sup>, Wendy L McArdle<sup>39</sup>, Peter McGuffin<sup>14</sup>, Kirsten E McLay<sup>1</sup>, Gil McVean<sup>5,18</sup>, Alex Mentzer<sup>40</sup>, Michael L Mimmack<sup>1</sup>, Ann E Morgan<sup>41</sup>, Andrew P Morris<sup>18</sup>, Craig Mowat<sup>42</sup>, Patricia B Munroe<sup>34</sup>, Simon Myers<sup>18</sup>, William Newman<sup>26</sup>, Elaine R Nimmo<sup>21</sup>, Michael C O'Donovan<sup>29</sup>, Abiodun Onipinla<sup>34</sup>, Nigel R Ovington<sup>17</sup>, Michael J Owen<sup>29</sup>, Kimmo Palin<sup>1</sup>, Aarno Palotie<sup>1</sup>, Kirstie Parnell<sup>2</sup>, Richard Pearson<sup>8</sup>, John RB Perry<sup>2,18</sup>, Anne Phillips<sup>42</sup>, Vincent Plagnol<sup>17</sup>, Natalie J Prescott<sup>9</sup>, Inga Prokopenko<sup>8,18</sup>, Michael A Quail<sup>1</sup>, Suzanne Rafelt<sup>11</sup>, Nigel W Rayner<sup>8,18</sup>, David M Reid<sup>33</sup>, Anthony Renwick<sup>16</sup>, Susan M Ring<sup>39</sup>, Neil Robertson<sup>8,18</sup>, Samuel Robson<sup>1</sup>, Ellie Russell<sup>29</sup>, David St Clair<sup>13</sup>, Jennifer G Sambrook<sup>3,4</sup>, Jeremy D Sanderson<sup>40</sup>, Stephen J Sawcer<sup>43</sup>, Helen Schuilenburg<sup>17</sup>, Carol E Scott<sup>1</sup>, Sheila Seal<sup>16</sup>, Sue Shaw-Hawkins<sup>34</sup>, Beverley M Shields<sup>2</sup>, Matthew J Simmonds<sup>8,10</sup>, Debbie J Smyth<sup>17</sup>, Elilan Somaskantharajah<sup>1</sup>, Katarina Spanova<sup>16</sup>, Sophia Steer<sup>44</sup>, Jonathan Stephens<sup>3,4</sup>, Helen E Stevens<sup>17</sup>, Kathy Stirrups<sup>1</sup>, Millicent A Stone<sup>45,46</sup>, David P Strachan<sup>47</sup>, Zhan Su<sup>5</sup>, Deborah PM Symmons<sup>7</sup>, John R Thompson<sup>48</sup>, Wendy Thomson<sup>7</sup>, Martin D Tobin<sup>48</sup>, Mary E Travers<sup>8</sup>, Clare Turnbull<sup>16</sup>, Damjan Vukcevic<sup>18</sup>, Louise V Wain<sup>48</sup>, Mark Walker<sup>49</sup>, Neil M Walker<sup>17</sup>, Chris Wallace<sup>17</sup>, Margaret Warren-Perry<sup>16</sup>, Nicholas A Watkins<sup>3,4</sup>, John Webster<sup>50</sup>, Michael N Weedon<sup>2</sup>, Anthony G Wilson<sup>51</sup>, Matthew Woodburn<sup>17</sup>, B Paul Wordsworth<sup>52</sup>, Chris Yau<sup>5</sup>, Allan H Young<sup>27,53</sup>, Eleftheria Zeggini<sup>1</sup>, Matthew A Brown<sup>52,54</sup>, Paul R Burton<sup>48</sup>, Mark J Caulfield<sup>34</sup>, Alastair Compston<sup>43</sup>, Martin Farrall<sup>55</sup>, Stephen CL Gough<sup>8,10,30</sup>, Alistair S Hall<sup>6</sup>, Andrew T Hattersley<sup>2,56</sup>, Adrian VS Hill<sup>18</sup>, Christopher G Mathew<sup>9</sup>, Marcus Pembrey<sup>57</sup>, Jack Satsangi<sup>21</sup>, Michael R Stratton<sup>1,16</sup>, Jane Worthington<sup>7</sup>, Matthew E Hurles<sup>1</sup>, Audrey Duncanson<sup>58</sup>, Willem H Ouwehand<sup>1,3,4</sup>, Miles Parkes<sup>12</sup>, Nazneen Rahman<sup>16</sup>, John A Todd<sup>17</sup>, Nilesh J Samani<sup>11,59</sup>, Dominic P Kwiatkowski<sup>1,18</sup>, Mark I McCarthy<sup>8,18,60</sup>, Nick Craddock<sup>29</sup>, Panos Deloukas<sup>1</sup>, Peter Donnelly<sup>5,18</sup>.

- 1 The Wellcome Trust Sanger Institute, Wellcome Trust Genome Campus, Hinxton, Cambridge, CB10 1SA UK.
- 2 Genetics of Complex Traits, Peninsula College of Medicine and Dentistry University of Exeter, EX1 2LU, UK.
- 3 Department of Haematology, University of Cambridge, Long Road, Cambridge, CB2 0PT, UK.
- 4 National Health Service Blood and Transplant, Cambridge Centre, Long Road, Cambridge CB2 0PT, UK.
- 5 Department of Statistics, University of Oxford, 1 South Parks Road, Oxford, OX1 3TG, UK.
- 6 Multidisciplinary Cardiovascular Research Centre (MCRC), Leeds Institute of Genetics, Health and Therapeutics (LIGHT), University of Leeds, Leeds, LS2 9JT, UK.
- 7 arc Epidemiology Unit, Stopford Building, University of Manchester, Oxford Road, Manchester, M13 9PT, UK.
- 8 Oxford Centre for Diabetes, Endocrinology and Medicine, University of Oxford, Churchill Hospital, Oxford OX3 7LJ, UK.
- 9 Department of Medical and Molecular Genetics, King's College London School of Medicine, 8th Floor Guy's Tower, Guy's Hospital, London, SE1 9RT, UK.
- 10 Centre for Endocrinology, Diabetes and Metabolism, Institute of Biomedical Research, University of Birmingham, Birmingham, B15 2TT, UK.
- 11 Department of Cardiovascular Sciences, University of Leicester, Glenfield Hospital, Groby Road, Leicester LE3 9QP, UK.
- 12 IBD Genetics Research Group, Addenbrooke's Hospital, Cambridge, CB2 0QQ, UK.
- 13 University of Aberdeen, Institute of Medical Sciences, Foresterhill, Aberdeen AB25 2ZD, UK.
- 14 SGDP, The Institute of Psychiatry, King's College London, De Crespigny Park, Denmark Hill, London SE5 8AF, UK.
- 15 Clinical Pharmacology Unit, University of Cambridge, Addenbrookes Hospital, Hills Road, Cambridge CB2 2QQ, UK.
- 16 Section of Cancer Genetics, Institute of Cancer Research, 15 Cotswold Road, Sutton SM2 5NG, UK.
- 17 Juvenile Diabetes Research Foundation/Wellcome Trust Diabetes and Inflammation Laboratory, Department of Medical Genetics, Cambridge Institute for Medical Research, University of Cambridge, Wellcome Trust/MRC Building, Cambridge CB2 0XY, UK.
- 18 The Wellcome Trust Centre for Human Genetics, University of Oxford, Roosevelt Drive, Oxford OX3 7BN, UK.
- 19 Department of Psychiatry, University of Birmingham, National Centre for Mental Health, 25 Vincent Drive, Birmingham, B15 2FG, UK.
- 20 BHF Glasgow Cardiovascular Research Centre, University of Glasgow, 126 University Place, Glasgow, G12 8TA, UK.
- 21 Gastrointestinal Unit, Division of Medical Sciences, School of Molecular and Clinical Medicine, University of Edinburgh, Western General Hospital, Edinburgh EH4 2XU, UK.
- 22 Faculty of Medicine, University of Southampton and Wessex Clinical Genetics Service, UHSFT, Southampton, UK. SO16 5YA
- 23 Endoscopy Regional Training Unit, Torbay Hospital, Torbay TQ2 7AA, UK.
- 24 Academic Unit of Musculoskeletal Disease, University of Leeds, Chapel Allerton Hospital, Leeds, West Yorkshire LS7 4SA, UK.
- 25 MRC Centre for Causal Analyses in Translational Epidemiology, Department of Social Medicine, University of Bristol, Bristol, BS8 2BN, UK.
- 26 Department of Medical Genetics, Manchester Academic Health Science Centre (MAHSC), University of Manchester, Manchester M13 0JH, UK.
- 27 School of Neurology, Neurobiology and Psychiatry, Royal Victoria Infirmary, Queen Victoria Road, Newcastle upon Tyne, NE1 4LP, UK.
- 28 Institute for Digestive Diseases, University College London Hospitals Trust, London NW1 2BU, UK.
- 29 MRC Centre for Neuropsychiatric Genetics and Genomics, School of Medicine, Cardiff University, Heath Park, Cardiff, CF14 4XN, UK.
- 30 University Hospital Birmingham NHS Foundation Trust, Birmingham, B15 2TT, UK.
- 31 University of Oxford, Institute of Musculoskeletal Sciences, Botnar Research Centre, Oxford, OX3 7LD, UK.
- 32 Centre for Diabetes and Metabolic Medicine, Barts and The London, Royal London Hospital, Whitechapel, London, E1 1BB, UK.



- 33 Bone Research Group, Department of Medicine and Therapeutics, University of Aberdeen, Aberdeen, AB25  
2ZD, UK.
- 34 Clinical Pharmacology and Barts and The London Genome Centre, William Harvey Research Institute, Barts  
and The London School of Medicine and Dentistry, Queen Mary University of London, Charterhouse  
Square, London EC1M 6BQ, UK.
- 35 Institute of Cellular Medicine, Musculoskeletal Research Group, 4th Floor, Catherine Cookson Building, The  
Medical School, Framlington Place, Newcastle upon Tyne, NE2 4HH, UK.
- 36 Gastroenterology Unit, Radcliffe Infirmary, University of Oxford, Oxford, OX2 6HE, UK.
- 37 Centre National de Genotypage, 2, Rue Gaston Cremieux, Evry, Paris 91057, France.
- 38 Department of Gastroenterology & Hepatology, University of Newcastle upon Tyne, Royal Victoria  
Infirmary, Newcastle upon Tyne NE1 4LP, UK.
- 39 ALSPAC Laboratory, Department of Social Medicine, University of Bristol, BS8 2BN, UK.
- 40 Division of Nutritional Sciences, King's College London School of Biomedical and Health Sciences, London  
SE1 9NH, UK.
- 41 NIHR-Leeds Musculoskeletal Biomedical Research Unit, University of Leeds, Chapel Allerton Hospital,  
Leeds, West Yorkshire LS7 4SA, UK.
- 42 Department of General Internal Medicine, Ninewells Hospital and Medical School, Ninewells Avenue,  
Dundee DD1 9SY, UK.
- 43 Department of Clinical Neurosciences, University of Cambridge, Addenbrooke's Hospital, Hills Road,  
Cambridge, CB2 2QQ, UK.
- 44 Clinical and Academic Rheumatology, Kings College Hospital National Health Service Foundation Trust,  
Denmark Hill, London SE5 9RS, UK.
- 45 University of Toronto, St. Michael's Hospital, 30 Bond Street, Toronto, Ontario M5B 1W8, Canada.
- 46 University of Bath, Claverdon, Norwood House, Room 5.11a Bath Somerset BA2 7AY, UK.
- 47 Division of Community Health Sciences, St George's, University of London, London SW17 0RE, UK.
- 48 Departments of Health Sciences and Genetics, University of Leicester, 217 Adrian Building, University  
Road, Leicester, LE1 7RH, UK.
- 49 Diabetes Research Group, School of Clinical Medical Sciences, Newcastle University, Framlington Place,  
Newcastle upon Tyne NE2 4HH, UK.
- 50 Medicine and Therapeutics, Aberdeen Royal Infirmary, Foresterhill, Aberdeen, Grampian AB9 2ZB, UK.
- 51 School of Medicine and Biomedical Sciences, University of Sheffield, Sheffield, S10 2JF, UK.
- 52 Nuffield Department of Orthopaedics, Rheumatology and Musculoskeletal Sciences, Nuffield Orthopaedic  
Centre, University of Oxford, Windmill Road, Headington, Oxford, OX3 7LD, UK.
- 53 UBC Institute of Mental Health, 430-5950 University Boulevard Vancouver, British Columbia, V6T 1Z3,  
Canada.
- 54 Diamantina Institute of Cancer, Immunology and Metabolic Medicine, Princess Alexandra Hospital,  
University of Queensland, Ipswich Road, Woolloongabba, Brisbane, Queensland, 4102, Australia.
- 55 Cardiovascular Medicine, University of Oxford, Wellcome Trust Centre for Human Genetics, Roosevelt  
Drive, Oxford OX3 7BN, UK.
- 56 Genetics of Diabetes, Peninsula College of Medicine and Dentistry, University of Exeter, Barrack Road,  
Exeter, EX2 5DW, UK.
- 57 Clinical and Molecular Genetics Unit, Institute of Child Health, University College London, 30 Guilford  
Street, London WC1N 1EH, UK.
- 58 The Wellcome Trust, Gibbs Building, 215 Euston Road, London NW1 2BE, UK.
- 59 Leicester NIHR Biomedical Research Unit in Cardiovascular Disease, Glenfield Hospital, Leicester, LE3  
9QP, UK.
- 60 Oxford NIHR Biomedical Research Centre, Churchill Hospital, Oxford, OX3 7LJ, UK.

## The Breast and Ovarian Cancer Susceptibility Collaboration (BOCS)

The following individuals are part of Breast and Ovarian Cancer Susceptibility Collaboration (BOCS)

A. Ardern-Jones<sup>1</sup>, J. Adlard<sup>2</sup>, M. Ahmed<sup>3</sup>, G. Attard<sup>4</sup>, K. Bailey<sup>5</sup>, E. Bancroft<sup>1</sup>, C. Bardsley<sup>6</sup>, D. Barton<sup>7</sup>, M. Bartlett<sup>8</sup>, J. Barwell<sup>9</sup>, L. Baxter<sup>6</sup>, R. Belk<sup>10</sup>, J. Berg<sup>11</sup>, B. Bernhard<sup>8</sup>, T. Bishop<sup>2</sup>, L. Boyes<sup>12</sup>, N. Bradshaw<sup>13</sup>, A.F. Brady<sup>8</sup>, S. Brant<sup>14</sup>, C. Brewer<sup>14</sup>, G. Brice<sup>4</sup>, G. Bromilow<sup>14</sup>, C. Brooks<sup>15</sup>, A. Bruce<sup>16</sup>, B. Bulman<sup>10</sup>, L. Burgess<sup>12</sup>, J. Campbell<sup>17</sup>, N. Canham<sup>8</sup>, B. Castle<sup>3</sup>, R. Cetnarskyj<sup>17</sup>, C. Chapman<sup>12</sup>, O. Claber<sup>18</sup>, N. Coates<sup>19</sup>, T. Cole<sup>12</sup>, A. Collins<sup>3</sup>, J. Cook<sup>6</sup>, S. Coulson<sup>15</sup>, G. Crawford<sup>3</sup>, D. Cruger<sup>12</sup>, C. Cummings<sup>8</sup>, L. D'Mello<sup>1</sup>, R. Davidson<sup>13</sup>, L. Day<sup>3</sup>, B. Dell<sup>3</sup>, C. Dolling<sup>12</sup>, A. Donaldson<sup>19</sup>, H. Dorkins<sup>8</sup>, F. Douglas<sup>18</sup>, S. Downing<sup>20</sup>, S. Drummond<sup>17</sup>, C. Dubras<sup>3</sup>, J. Dunlop<sup>11</sup>, S. Durrell<sup>21</sup>, D. Eccles<sup>3</sup>, C. Eddy<sup>4</sup>, M. Edwards<sup>17</sup>, E. Edwards<sup>3</sup>, J. Edwardson<sup>22</sup>, R. Eeles<sup>1</sup>, I. Ellis<sup>15</sup>, F. Elmslie<sup>4</sup>, G. Evans<sup>10</sup>, B. Gibbons<sup>22</sup>, C. Gardiner<sup>3</sup>, N. Ghali<sup>8</sup>, C. Giblin<sup>10</sup>, S. Gibson<sup>13</sup>, S. Goff<sup>4</sup>, S. Goodman<sup>14</sup>, D. Goudie<sup>11</sup>, L. Greenhalgh<sup>15</sup>, J. Grier<sup>5</sup>, H. Gregory<sup>22</sup>, S. Halliday<sup>1</sup>, R. Hardy<sup>7</sup>, C. Hartigan<sup>9</sup>, T. Heaton<sup>12</sup>, A. Henderson<sup>18</sup>, C. Higgins<sup>15</sup>, S. Hodgson<sup>4</sup>, T. Homfray<sup>4</sup>, D. Horrigan<sup>5</sup>, C. Houghton<sup>15</sup>, R.S. Houlston<sup>1</sup>, L. Hughes<sup>20</sup>, V. Hunt<sup>14</sup>, L. Irvine<sup>13</sup>, L. Izatt<sup>24</sup>, C. Jacobs<sup>24</sup>, S. James<sup>22</sup>, M. James<sup>19</sup>, L. Jeffers<sup>7</sup>, I. Jobson<sup>18</sup>, W. Jones<sup>4</sup>, M.J. Kennedy<sup>5</sup>, S. Kenwright<sup>20</sup>, C. Kightley<sup>15</sup>, C. Kirk<sup>7</sup>, E. Kirk<sup>5</sup>, E. Kivuva<sup>14</sup>, K. Kohut<sup>1</sup>, M. Kosicka-Slawinska<sup>8</sup>, A. Kulkarni<sup>8</sup>, A. Kumar<sup>16</sup>, F. Lalloo<sup>10</sup>, N. Lambord<sup>14</sup>, C. Langman<sup>24</sup>, P. Leonard<sup>12</sup>, S. Levene<sup>24</sup>, S. Locker<sup>5</sup>, P. Logan<sup>7</sup>, M. Longmuir<sup>13</sup>, A. Lucassen<sup>3</sup>, V. Lyus<sup>8</sup>, A. Magee<sup>7</sup>, A. Male<sup>16</sup>, S. Mansour<sup>4</sup>, D. McBride<sup>3</sup>, E. McCann<sup>5</sup>, V. McConnell<sup>7</sup>, M. McEntagart<sup>4</sup>, C. McKeown<sup>12</sup>, L. McLeish<sup>11</sup>, D. McLeod<sup>21</sup>, A. Melville<sup>8</sup>, L. Mercer<sup>6</sup>, C. Mercer<sup>3</sup>, Z. Miedzybrodzka<sup>22</sup>, A. Mitra<sup>1</sup>, P. J. Morrison<sup>7</sup>, V. Murday<sup>4</sup>, A. Murray<sup>5</sup>, K. Myhill<sup>1</sup>, J. Myring<sup>11</sup>, E. O'Hara<sup>2</sup>, J. Paterson<sup>20</sup>, P. Pearson<sup>17</sup>, G. Pichert<sup>24</sup>, K. Platt<sup>5</sup>, M. Porteous<sup>17</sup>, C. Pottinger<sup>15</sup>, S. Price<sup>21</sup>, L. Protheroe<sup>5</sup>, S. Pugh<sup>19</sup>, O. Quarrell<sup>6</sup>, K. Randhawa<sup>8</sup>, C. Riddick<sup>5</sup>, L. Robertson<sup>1</sup>, A. Robinson<sup>20</sup>, V. Roffey-Johnson<sup>9</sup>, M. Rogers<sup>5</sup>, S. Rose<sup>8</sup>, S. Rowe<sup>10</sup>, A. Schofield<sup>22</sup>, N. Rahman<sup>1</sup>, S. Saya<sup>1</sup>, G. Scott<sup>13</sup>, J. Scott<sup>7</sup>, A. Searle<sup>14</sup>, S. Shanley<sup>1</sup>, S. Sharif<sup>12</sup>, A. Shaw<sup>24</sup>, J. Shaw<sup>15</sup>, J. Shea-Simonds<sup>3</sup>, L. Side<sup>16</sup>, J. Sillibourne<sup>3</sup>, K. Simon<sup>16</sup>, S. Simpson<sup>22</sup>, S. Slater<sup>17</sup>, S. Smalley<sup>3</sup>, K. Smith<sup>19</sup>, L. Snadden<sup>13</sup>, K. Snape<sup>1</sup>, J. Soloway<sup>16</sup>, Y. Stait<sup>14</sup>, B. Stayner<sup>21</sup>, M. Steel<sup>17</sup>, C. Steel<sup>11</sup>, H. Stewart<sup>21</sup>, D. Stirling<sup>17</sup>, M. Thomas<sup>14</sup>, S. Thomas<sup>1</sup>, S. Tomkins<sup>19</sup>, H. Turner<sup>5</sup>, A. Vandersteen<sup>8</sup>, E. Wakeling<sup>8</sup>, F. Waldrup<sup>20</sup>, L. Walker<sup>21</sup>, C. Watt<sup>13</sup>, S. Watts<sup>24</sup>, A. Webber<sup>15</sup>, C. Whyte<sup>17</sup>, J. Wiggins<sup>1</sup>, E. Williams<sup>16</sup>, L. Winchester<sup>4</sup>

<sup>1</sup> Dept of Cancer Genetics, Royal Marsden NHS Foundation Trust, Sutton, SM2 5PT, UK

<sup>2</sup> Yorkshire Regional Genetics Service, Chapel Allerton Hospital, Leeds, LS7 4SA, UK

<sup>3</sup> Faculty of Medicine, University of Southampton, Southampton University Hospitals NHS Trust, SO16 5YA, UK

<sup>4</sup> SW Thames Regional Genetics Service, St George's Hospital, London, SW17 0RE, UK

<sup>5</sup> All Wales Medical Genetics Service, University Hospital of Wales, Cardiff, CF14 4XW, UK

<sup>6</sup> Sheffield Regional Genetics Service, Sheffield Children's NHS Foundation Trust, S10 2TH, UK

<sup>7</sup> Northern Ireland Regional Genetics Service, Belfast HSC Trust, Department of Medical Genetics, Queen's University Belfast, BT9 7AB, UK

<sup>8</sup> NW Thames Regional Genetics Service, Kennedy Galton Centre, London, HA1 3UJ, UK

<sup>9</sup> Leicestershire Genetics Centre, University Hospitals of Leicester NHS Trust, LE1 5WW, UK

<sup>10</sup> Genetic Medicine, Manchester Academic Health Science Centre, St. Mary's Hospital, Manchester M13 9WL, UK

<sup>11</sup> Human genetics, Division of Medical Sciences, University of Dundee, DD1 9SY, UK

- <sup>12</sup> West Midlands Regional Genetics Service, Birmingham Women's Hospital, Birmingham, B15 2TG, UK
- <sup>13</sup> West of Scotland Regional Genetics Service, Laboratory Medicine, Southern General Hospital, Glasgow, G51 4TF, UK
- <sup>14</sup> Peninsula Regional Genetics Service, Royal Devon & Exeter Hospital, Exeter, EX1 2ED, UK
- <sup>15</sup> Merseyside and Cheshire Clinical Genetics Service, Liverpool Women's NHS Foundation Trust, Liverpool, L8 7SS, UK
- <sup>16</sup> NE Thames Regional Genetics Service, Great Ormond St Hospital, London, WC1N 3JH, UK
- <sup>17</sup> South East of Scotland Clinical Genetics Service, Western General Hospital, Edinburgh, EH4 2XU, UK
- <sup>18</sup> Northern Genetics Service, Newcastle upon Tyne Hospitals NHS Foundation Trust, NE1 3BZ, UK
- <sup>19</sup> South Western Regional Genetics Service, University Hospitals of Bristol NHS Foundation Trust, BS2 8EG, UK
- <sup>20</sup> East Anglian Regional Genetics Service, Cambridge University Hospitals NHS Foundation Trust, CB2 0QQ, UK
- <sup>21</sup> Oxford Regional Genetics Service, Oxford University Hospitals NHS Trust, Oxford, OX3 7LJ, UK
- <sup>22</sup> University of Aberdeen and North of Scotland Clinical Genetics Service, Aberdeen Royal Infirmary, AB25 2ZA, UK
- <sup>24</sup> SE Thames Regional Genetics Service, Guy's and St Thomas NHS Foundation Trust, London, SE1 9RT, UK
